# Supplementary material for: Object approach computation by a giant neuron and its relation with the speed of escape in the crab Neohelice
Source: Oxford University Press journal article supplement (doi:10.1242/jeb.136820), 2016-01-01
Supplement: jeb136820supp.pdf [file jeb136820supp.pdf]

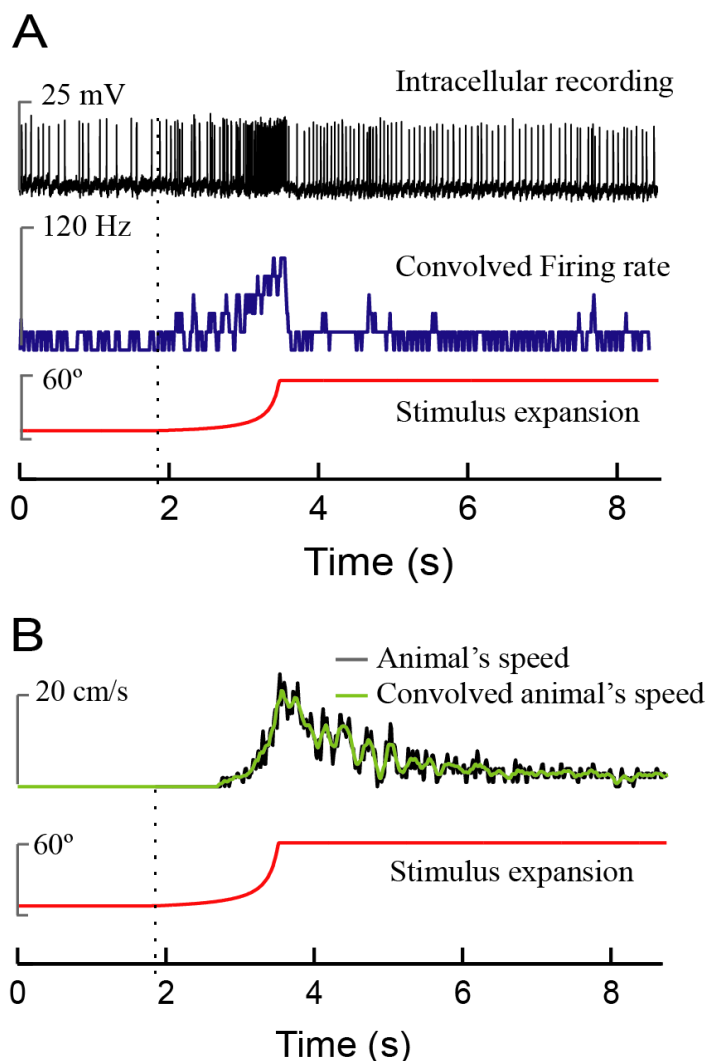

**Figure S1:** Examples of raw and convolved results of an electrophysiological MLG2 response and a behavioural escape response to stimuli 7 (Table 1). **(A)** Upper trace (black): intracellular recording. Middle trace (blue): Estimate of the instantaneous firing frequency obtained by smoothing the response with 50 ms square window. Bottom trace (red): Stimulus angular size  $\theta(t)$ . **(B)** Upper trace (black): running speed recording from one animal; (green) estimate of the instantaneous speed obtained by smoothing the response with 100 ms square windows. Bottom trace (red): Stimulus angular size  $\theta(t)$ . Dotted vertical lines signal the beginning of the stimulus expansion.
